# Supplementary material
Source: MDPI journal article supplement (https://www.mdpi.com/2073-4441/9/4/296)
Supplement: s1 [file s1]

Archive with 3 entries (3 files):
- FigS3.pdf
- FigS4.pdf
- Pluvial flooding in European cities_sup info.pdf
