# Supplementary material
Source: MDPI journal article supplement (https://www.mdpi.com/2073-4441/9/4/296)

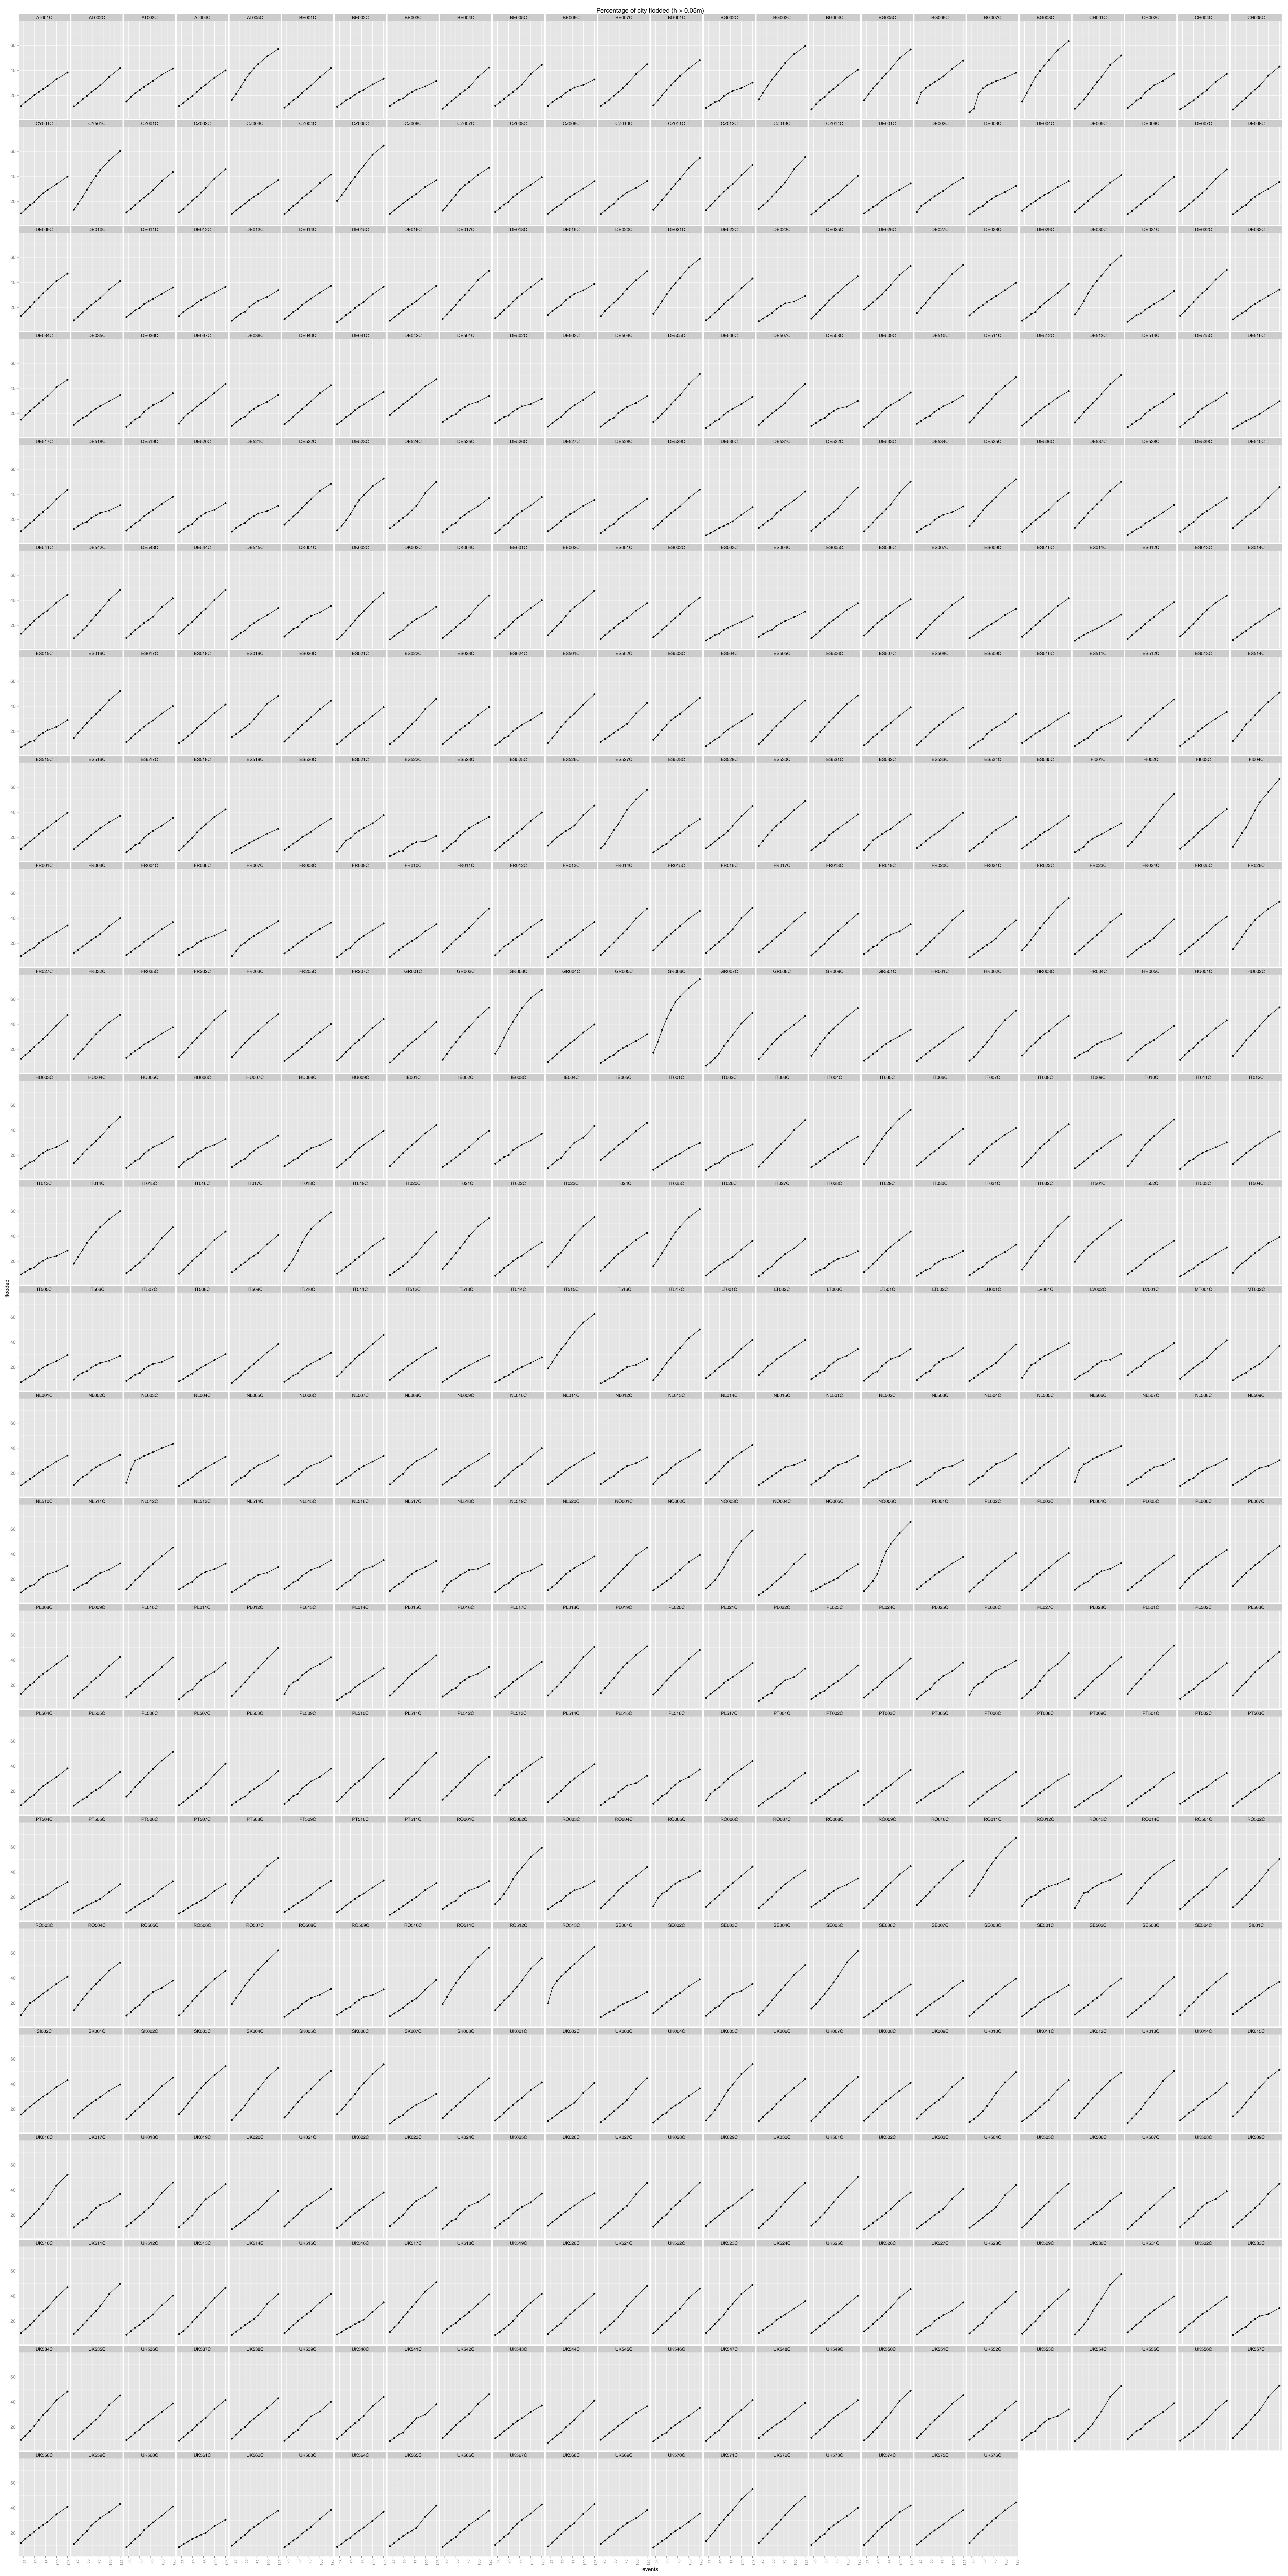

Supplement: s1 [file s1 › FigS3.pdf]

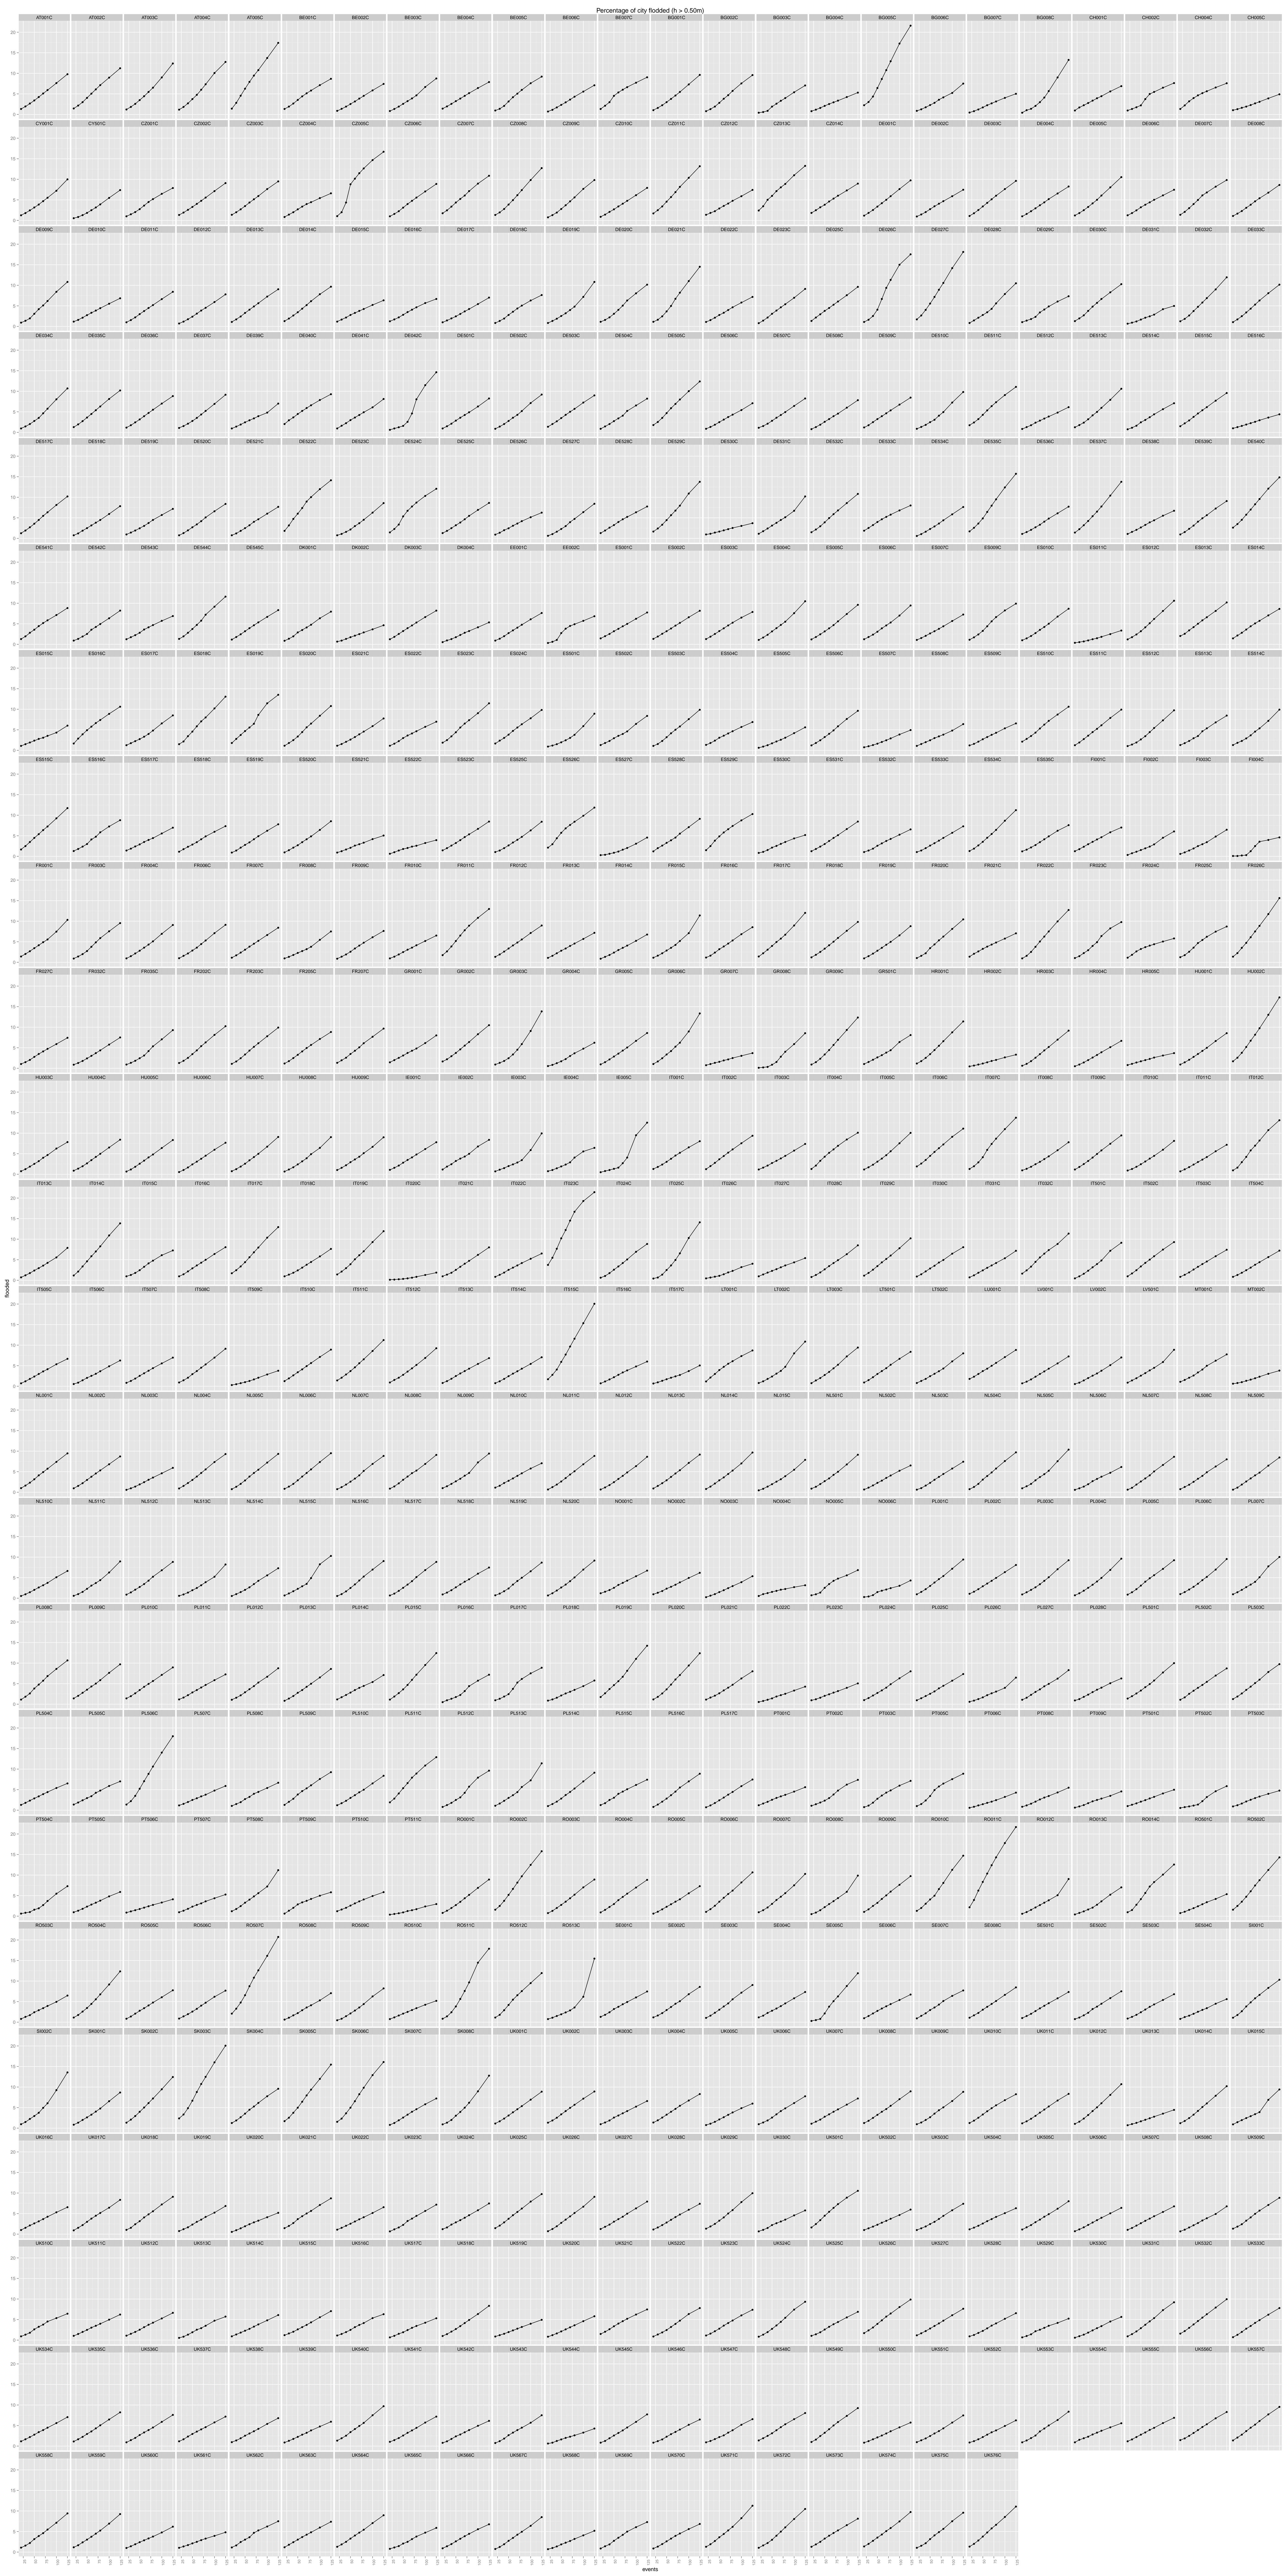

Supplement: s1 [file s1 › FigS4.pdf]
